# Supplementary material
Source: PubMed Central journal article supplement (PMC4912845)
Supplement: NIHMS750067-supplement-01.pdf [file NIHMS750067-supplement-01.pdf]

**Table ST1: Comparison of baseline characteristics between included and excluded subjects.**

| <b>Variables</b>                               | <b>Total<br/>N = 12,373</b> | <b>Included<br/>N = 9,660</b> | <b>Excluded<br/>N = 2,713</b> | <b>P-value</b>   |
|------------------------------------------------|-----------------------------|-------------------------------|-------------------------------|------------------|
| Age (Years) - Mean (SD)                        | <b>63(13.8)</b>             | <b>63(13.5)</b>               | <b>63(14.9)</b>               | <b>0.07</b>      |
| Median                                         | <b>63</b>                   | <b>64</b>                     | <b>63</b>                     |                  |
| 10 <sup>th</sup> - 90 <sup>th</sup> percentile | <b>44-81</b>                | <b>45 - 80</b>                | <b>43-82</b>                  |                  |
| Follow Up (Years) – Mean (SD)                  | <b>4.9(3.5)</b>             | <b>4.8(3.3)</b>               | <b>5.6(3.9)</b>               | <b>&lt;0.001</b> |
|                                                |                             | <b>N (%)</b>                  |                               |                  |
| Gender (Male)                                  | <b>7,905 (63.89%)</b>       | <b>6,042 (62.55%)</b>         | <b>1,863 (68.67%)</b>         | <b>&lt;0.001</b> |
| Ever smoker*                                   | <b>6,251 (52.09%)</b>       | <b>4,940 (51.91%)</b>         | <b>1,311 (52.80%)</b>         | <b>0.428</b>     |
| Hiatal Hernia                                  | <b>2,517 (20.34%)</b>       | <b>2,058 (21.30%)</b>         | <b>459 (16.92%)</b>           | <b>&lt;0.001</b> |
| Diabetes                                       | <b>705 (5.70%)</b>          | <b>651 (6.74%)</b>            | <b>54 (1.99%)</b>             | <b>&lt;0.001</b> |
| PPIs                                           | <b>10,341 (83.58%)</b>      | <b>8,177 (84.65%)</b>         | <b>2,164 (79.76%)</b>         | <b>&lt;0.001</b> |
| NSAIDs                                         | <b>7,529 (60.85%)</b>       | <b>6,015 (62.27%)</b>         | <b>1,514 (55.81%)</b>         | <b>&lt;0.001</b> |
| Statins                                        | <b>3,016 (24.38%)</b>       | <b>2,668 (27.62%)</b>         | <b>348 (12.83%)</b>           | <b>&lt;0.001</b> |
| Metformin                                      | <b>680 (5.50%)</b>          | <b>630 (6.52%)</b>            | <b>50 (1.84%)</b>             | <b>&lt;0.001</b> |
| Insulin                                        | <b>238 (1.92%)</b>          | <b>226 (2.34%)</b>            | <b>12 (0.44%)</b>             | <b>&lt;0.001</b> |
| OAD                                            | <b>841 (6.80%)</b>          | <b>767 (7.94%)</b>            | <b>74 (2.73%)</b>             | <b>&lt;0.001</b> |

\*Smoking percentages were taken among patients without missing information, so

percentages are not reflective of the total.

**Supplementary table ST2:**

**Effect of PPI dosage (once a day versus twice a day) on risk of progression from BE to esophageal carcinoma.**

| Drugs     | Multivariate Analysis |         |
|-----------|-----------------------|---------|
|           | HR (95% CI)           | P value |
| PPI 1 QD  | 1.13 (0.63, 2.03)     | 0.688   |
| PPI BID   | 0.97 (0.51, 1.86)     | 0.93    |
| NSAIDs    | 0.95 (0.63, 1.42)     | 0.79    |
| Statins   | 0.60 (0.34, 1.09)     | 0.095   |
| Metformin | 0.50 (0.09, 2.78)     | 0.431   |
|           |                       |         |
| Insulin   | .58 (0.10, 3.42)      | 0.55    |
| OAD       | 3.49 (0.84, 14.49)    | 0.085   |

**Supplementary table ST3a:**

**Effect of varying definitions of incident cancer from 6m to 18 m on associations with demographic variables.**

|                          |                            |             | > 12 months                  |             | > 6 months                   |             | > 18 months                  |             |
|--------------------------|----------------------------|-------------|------------------------------|-------------|------------------------------|-------------|------------------------------|-------------|
| <b>Variables</b>         | <b>Univariate Analysis</b> |             | <b>Multivariate Analysis</b> |             | <b>Multivariate Analysis</b> |             | <b>Multivariate Analysis</b> |             |
|                          | HR (95% CL)                | P Value     | HR (95% CL)                  | P Value     | HR (95% CL)                  | P Value     | HR (95% CL)                  | P Value     |
| Age (per yr)             | 1.03<br>(1.01, 1.04)       | 0.001       | 1.04<br>(1.02, 1.05)         | <0.000<br>1 | 1.04<br>(1.02, 1.05)         | <0.000<br>1 | 1.04<br>(1.02, 1.05)         | <0.000<br>1 |
| Male sex                 | 2.39<br>(1.48, 3.87)       | <0.000<br>1 | 2.79<br>(1.69, 4.62)         | <0.000<br>1 | 2.83<br>(1.77, 4.53)         | <0.000<br>1 | 2.79<br>(1.68, 4.62)         | <0.000<br>1 |
| Ever smoker              | 1.22<br>(0.82, 1.82)       | 0.317       | 1.08<br>(0.71, 1.63)         | 0.722       | 1.17<br>(0.79, 1.72)         | 0.441       | 1.06<br>(0.70, 1.61)         | 0.781       |
| Ever drinker             | 0.72<br>(0.35, 1.49)       | 0.377       | XX                           | XX          | XX                           | XX          | XX                           | XX          |
| BMI (normal)             | Reference                  |             |                              |             |                              |             |                              |             |
| Overweight (BMI 25-29.9) | 1.55<br>(0.97, 2.47)       | 0.067       | 1.54<br>(0.96, 2.48)         | 0.072       | 1.57<br>(1.01, 2.44)         | 0.044       | 1.61<br>(1.00, 2.59)         | 0.052       |
| Obese I (BMI 30-34.9)    | 1.30<br>(0.72, 2.34)       | 0.389       | 1.70<br>(0.92, 3.13)         | 0.091       | 1.77<br>(1.02, 3.09)         | 0.043       | 1.77<br>(0.96, 3.28)         | 0.069       |
| Obese II (BMI > 34.9)    | 1.30<br>(0.18, 9.47)       | 0.799       | 2.22<br>(0.30, 16.62)        | 0.437       | 1.98<br>(0.27, 14.57)        | 0.504       | 2.35<br>(0.31, 17.64)        | 0.405       |
| Hiatal Hernia            | 1.00<br>(0.62, 1.63)       | 0.987       | 0.99<br>(0.61, 1.60)         | 0.958       | 1.00<br>(0.65, 1.56)         | 0.983       | 0.99<br>(0.61, 1.6)          | 0.954       |
| Diabetes                 | 0.61<br>(0.19, 1.94)       | 0.404       | 0.33<br>(0.06, 1.85)         | 0.207       | 0.38<br>(0.08, 1.90)         | 0.237       | 0.33<br>(0.06, 1.86)         | 0.208       |

**Supplementary Table ST3b. Effect of varying definitions of incident cancer from 6m to 18 m on associations with medications (conventional models).**

| Drugs     | Univariate Analysis  |         | > 12 months           |         | > 6 months            |         | > 18 months           |         |
|-----------|----------------------|---------|-----------------------|---------|-----------------------|---------|-----------------------|---------|
|           | HR (95% CI)          | P value | HR (95% CI)           | P value | HR (95% CI)           | P value | HR (95% CI)           | P value |
| PPIs      | 0.98<br>(0.57, 1.69) | 0.938   | 1.05<br>(0.59, 1.86)  | 0.86    | 1.03<br>(0.61, 1.73)  | 0.91    | 1.13<br>(0.63, 2.04)  | 0.677   |
| NSAIDs    | 0.94<br>(0.63, 1.40) | 0.746   | 0.94<br>(0.63, 1.41)  | 0.77    | 0.92<br>(0.63, 1.33)  | 0.651   | 0.92<br>(0.61, 1.38)  | 0.687   |
| Statins   | 0.75<br>(0.44, 1.30) | 0.309   | 0.61<br>(0.34, 1.10)  | 0.102   | 0.72<br>(0.44, 1.18)  | 0.197   | 0.62<br>(0.34, 1.11)  | 0.11    |
| Metformin | 0.64<br>(0.20, 2.02) | 0.449   | 0.51<br>(0.09, 2.81)  | 0.437   | 0.60<br>(0.12, 2.98)  | 0.53    | 0.51<br>(0.09, 2.84)  | 0.44    |
| Insulin   | 0.65<br>(0.09, 4.68) | 0.673   | 0.57<br>(0.10, 3.35)  | 0.537   | 0.50<br>(0.09, 2.90)  | 0.44    | 0.58<br>(0.10, 3.37)  | 0.541   |
| OAD       | 0.85<br>(0.35, 2.10) | 0.732   | 3.38<br>(0.82, 13.95) | 0.092   | 2.60<br>(0.60, 11.33) | 0.202   | 3.41<br>(0.83, 14.04) | 0.09    |

**Supplementary Table ST3c. Effect of varying definitions of incident cancer from 6m to 18 m on associations with medications (time varying models).**

| Time varying | > 12 months       |         | > 6 months        |         | > 18 months       |         |
|--------------|-------------------|---------|-------------------|---------|-------------------|---------|
|              | HR (95% CI)       | P value | HR (95% CI)       | P value | HR (95% CI)       | P value |
| PPIs         | 0.43 (0.36, 0.52) | <0.0001 | 0.40 (0.32, 0.49) | <0.0001 | 0.43 (0.36, 0.52) | <0.0001 |
| NSAIDs       | 0.15 (0.01, 1.86) | 0.14    | 0.12 (0.01, 1.72) | 0.118   | 0.16 (0.01, 1.88) | 0.144   |
| Statins      | 0.61 (0.45, 0.83) | 0.002   | 0.59 (0.42, 0.81) | 0.001   | 0.61 (0.45, 0.83) | 0.002   |
| Metformin    | 0.57 (0.27, 1.21) | 0.142   | 0.55 (0.25, 1.22) | 0.142   | 0.57 (0.27, 1.2)  | 0.142   |
| Insulin      | xx                | xx      | xx                | xx      | xx                | xx      |
| OAD          | 1.26 (0.89, 1.78) | 0.193   | 1.26 (0.88, 1.79) | 0.206   | 1.26 (0.89, 1.79) | 0.187   |

| Definition for incident vs prevalent esophageal cancer             |                     |         | > 12 months           |         | > 6 months            |         | > 18 months           |         |
|--------------------------------------------------------------------|---------------------|---------|-----------------------|---------|-----------------------|---------|-----------------------|---------|
| Incidence of esophageal cancer (per 1000 patient-yrs of follow up) |                     |         | 2.23 (1.84, 2.71)     |         | 2.60 (2.23, 3.04)     |         | 2.17 (1.84, 2.58)     |         |
| Variables                                                          | Univariate Analysis |         | Multivariate Analysis |         | Multivariate Analysis |         | Multivariate Analysis |         |
|                                                                    | HR (95% CL)         | P Value | HR (95% CL)           | P Value | HR (95% CL)           | P Value | HR (95% CL)           | P Value |
| Age (per yr)                                                       | 1.03 (1.01, 1.04)   | 0.001   | 1.04 (1.02, 1.05)     | <0.0001 | 1.04 (1.02, 1.05)     | <0.0001 | 1.04 (1.02, 1.05)     | <0.0001 |
| Male sex                                                           | 2.39 (1.48, 3.87)   | <0.0001 | 2.79 (1.69, 4.62)     | <0.0001 | 2.83 (1.77, 4.53)     | <0.0001 | 2.79 (1.68, 4.62)     | <0.0001 |
| Ever smoker                                                        | 1.22 (0.82, 1.82)   | 0.317   | 1.08 (0.71, 1.63)     | 0.722   | 1.17 (0.79, 1.72)     | 0.441   | 1.06 (0.70, 1.61)     | 0.781   |
| Ever drinker                                                       | 0.72 (0.35, 1.49)   | 0.377   | XX                    | XX      | XX                    | XX      | XX                    | XX      |
| BMI (normal)                                                       | Reference           |         |                       |         |                       |         |                       |         |
| Overweight (BMI 25-29.9)                                           | 1.55 (0.97, 2.47)   | 0.067   | 1.54 (0.96, 2.48)     | 0.072   | 1.57 (1.01, 2.44)     | 0.044   | 1.61 (1.00, 2.59)     | 0.052   |
| Obese I (BMI 30-34.9)                                              | 1.30 (0.72, 2.34)   | 0.389   | 1.70 (0.92, 3.13)     | 0.091   | 1.77 (1.02, 3.09)     | 0.043   | 1.77 (0.96, 3.28)     | 0.069   |
| Obese II (BMI > 34.9)                                              | 1.30 (0.18, 9.47)   | 0.799   | 2.22 (0.30, 16.62)    | 0.437   | 1.98 (0.27, 14.57)    | 0.504   | 2.35 (0.31, 17.64)    | 0.405   |
| Hiatal Hernia                                                      | 1.00 (0.62, 1.63)   | 0.987   | 0.99 (0.61, 1.60)     | 0.958   | 1.00 (0.65, 1.56)     | 0.983   | 0.99 (0.61, 1.6)      | 0.954   |
| Diabetes                                                           | 0.61 (0.19, 1.94)   | 0.404   | 0.33 (0.06, 1.85)     | 0.207   | 0.38 (0.08, 1.90)     | 0.237   | 0.33 (0.06, 1.86)     | 0.208   |

**Supplementary table ST4b. Effect of excluding a proportion of subjects with BE who may not**

**have intestinal metaplasia on histology, on associations with medications (conventional analysis).**

|           |                      |         |                                                               |         | Removed 36%                                                   |         |
|-----------|----------------------|---------|---------------------------------------------------------------|---------|---------------------------------------------------------------|---------|
|           |                      |         | > 12 months                                                   |         | > 12 months                                                   |         |
| Drugs     | Univariate Analysis  |         | Multivariate Analysis<br>(Randomly removing<br>7% of cancers) |         | Multivariate Analysis<br>(Randomly removing<br>7% of cancers) |         |
|           | HR (95% CI)          | P value | HR (95% CI)                                                   | P value | HR (95% CI)                                                   | P value |
| PPIs      | 0.98 (0.57,<br>1.69) | 0.938   | 1.05 (0.59,<br>1.86)                                          | 0.86    | 1.24 (0.58,<br>2.66)                                          | 0.585   |
| NSAIDs    | 0.94 (0.63,<br>1.40) | 0.746   | 0.94 (0.63,<br>1.41)                                          | 0.77    | 0.86 (0.51,<br>1.44)                                          | 0.556   |
| Statins   | 0.75 (0.44,<br>1.30) | 0.309   | 0.61 (0.34,<br>1.10)                                          | 0.102   | 0.82 (0.41,<br>1.66)                                          | 0.586   |
| Metformin | 0.64 (0.20,<br>2.02) | 0.449   | 0.51 (0.09,<br>2.81)                                          | 0.437   | 0.16 (0.02,<br>1.56)                                          | 0.115   |
| Insulin   | 0.65 (0.09,<br>4.68) | 0.673   | 0.57 (0.10,<br>3.35)                                          | 0.537   | 0.120 (0.29,<br>5.05)                                         | 0.803   |
| OAD       | 0.85 (0.35,<br>2.10) | 0.732   | 3.38 (0.82,<br>13.95)                                         | 0.092   | 2.91 (0.68,<br>12.49)                                         | 0.15    |

**Supplementary Table ST4c. Effect of excluding a proportion of subjects with BE who may not have intestinal metaplasia on histology, on associations with medications (time varying analysis).**

|                     |                   |         | Removed 36%       |         |
|---------------------|-------------------|---------|-------------------|---------|
| <b>Time varying</b> | > 12 months       |         | > 12 months       |         |
| <b>Drugs</b>        | HR (95% CI)       | P value | HR (95% CI)       | P value |
| PPIs                | 0.43 (0.36, 0.52) | <0.0001 | 0.42 (0.32, 0.54) | <0.0001 |
| NSAIDs              | 0.15 (0.01, 1.86) | 0.14    | 0.32 (0.04, 2.74) | 0.299   |
| Statins             | 0.61 (0.45, 0.83) | 0.002   | 0.67 (0.48, 0.93) | 0.016   |
| Metformin           | 0.57 (0.27, 1.21) | 0.142   | 0.71 (0.28, 1.80) | 0.469   |
| Insulin             | xx                | xx      |                   |         |
| OAD                 | 1.26 (0.89, 1.78) | 0.193   | 1.18 (0.62, 2.24) | 0.614   |



**Supplementary Table ST5a: Comparison of Predictors of Progression to Esophageal**

**Carcinoma: Demographic and lifestyle factors between complete cohort and that included without any missing values.**

| Variables                | Total Sample (12,373) |         |                       |         | Included Study Sample (9,660) |         |                       |         |
|--------------------------|-----------------------|---------|-----------------------|---------|-------------------------------|---------|-----------------------|---------|
|                          | Univariate Analysis   |         | Multivariate Analysis |         | Univariate Analysis           |         | Multivariate Analysis |         |
|                          | HR (95% CL)           | P Value | HR (95% CL)           | P value | HR (95% CL)                   | P Value | HR (95% CL)           | P Value |
| Age (per yr)             | 1.03 (1.02, 1.04)     | <0.001  | 1.04 (1.03, 1.05)     | <0.001  | 1.03 (1.01, 1.04)             | <0.0001 | 1.04 (1.02, 1.05)     | <0.0001 |
| Male sex                 | 2.55 (1.91, 3.41)     | <0.001  | 3.13 (2.33, 4.21)     | <0.001  | 2.48 (1.53, 4.0)              | <0.0001 | 2.93 (1.81, 4.74)     | <0.0001 |
| Ever smoker              | 1.18 (0.93, 1.49)     | 0.176   | 1.28 (0.17, 9.34)     | 0.81    | 1.22 (0.82, 1.82)             | 0.317   | 1.08(0.71, 1.63)      | 0.722   |
| BMI (normal)             |                       |         |                       |         | Reference                     |         |                       |         |
| Overweight (BMI 25-29.9) |                       |         |                       |         | 1.64 (1.03, 2.60)             | 0.037   | 1.63 (1.02, 2.61)     | 0.040   |
| Obese I (BMI 30-34.9)    |                       |         |                       |         | 1.30 (0.72, 2.35)             | 0.383   | 1.71 (0.93, 3.17)     | 0.084   |
| Obese II (BMI > 34.9)    |                       |         |                       |         | 1.28 (0.17, 9.34)             | 0.810   | 2.24(0.30, 16.81)     | 0.436   |
| Hiatal Hernia            | 1.11 (0.85, 1.49)     | 0.445   | 1.22 (0.93, 1.61)     | 0.155   | 0.97 (0.72, 1.22)             | 0.894   | 0.97 (0.72, 1.22)     | 0.899   |

|          |                      |       |                      |       |                         |       |                          |       |
|----------|----------------------|-------|----------------------|-------|-------------------------|-------|--------------------------|-------|
|          | 1.46)                |       | 1.62)                |       | (0.60,<br>1.56)         |       | (0.60,<br>1.57)          |       |
| Diabetes | 0.95 (0.56,<br>1.63) | 0.865 | 0.64 (0.23,<br>1.75) | 0.385 | 0.60<br>(0.19,<br>1.89) | 0.382 | 0.33<br>(0.059,<br>1.87) | 0.211 |

**Supplementary Table ST5b: Comparison of Predictors of Progression to Esophageal Carcinoma**

– Medications between complete cohort and cohort with no missing variables.

| Drugs     | Total Sample (12,373) |         |                       |         | Included Study Sample (9,660) |         |                       |         |
|-----------|-----------------------|---------|-----------------------|---------|-------------------------------|---------|-----------------------|---------|
|           | Univariate Analysis   |         | Multivariate Analysis |         | Univariate Analysis           |         | Multivariate Analysis |         |
|           | HR (95% CI)           | P value | HR (95% CI)           | P value | HR (95% CI)                   | P value | HR (95% CI)           | P value |
| PPIs      | 0.67 (0.51, 0.88)     | 0.004   | 0.69 (0.52, 0.92)     | 0.011   | 0.88 (0.52, 1.47)             | 0.617   | 0.94 (0.55, 1.60)     | 0.816   |
| NSAIDs    | 1.07 (0.85, 1.36)     | 0.544   | 1.13 (0.89, 1.43)     | 0.319   | 0.91 (0.61, 1.35)             | 0.645   | 0.93 (0.63, 1.37)     | 0.707   |
| Statins   | 1.18 (0.91, 1.54)     | 0.216   | 0.96 (0.73, 1.28)     | 0.797   | 0.73 (0.43, 1.26)             | 0.264   | 0.59 (0.32, 1.07)     | 0.080   |
| Metformin | 0.85 (0.48, 1.51)     | 0.580   | 0.57 (0.22, 1.45)     | 0.238   | 0.63 (0.20, 1.97)             | 0.425   | 0.45 (0.86, 2.40)     | 0.353   |
| Insulin   | 0.63 (0.20, 1.95)     | 0.419   | 0.56 (0.18, 1.73)     | 0.317   | 0.64 (0.09, 4.58)             | 0.658   | 0.76 (0.11, 5.17)     | 0.781   |
| OAD       | 1.02 (0.64, 1.65)     | 0.923   | 2.09 (0.69, 6.30)     | 0.192   | 0.83 (0.34, 2.05)             | 0.691   | 1.54 (0.46, 5.18)     | 0.486   |

**Supplementary table ST6a. Analysis of associations with demographic variables in a subset of BE patients who have not have surveillance endoscopy in the last 3 years (as a surrogate marker for BE patients without dysplasia).**

|                          |                            |         |                              |         | <b>&lt; 1 Endo in past 3 yr</b> |         |
|--------------------------|----------------------------|---------|------------------------------|---------|---------------------------------|---------|
|                          |                            |         | > 12 months                  |         | > 12 months                     |         |
| <b>Variables</b>         | <b>Univariate Analysis</b> |         | <b>Multivariate Analysis</b> |         | <b>Multivariate Analysis</b>    |         |
|                          | HR (95% CL)                | P Value | HR (95% CL)                  | P Value | HR (95% CL)                     | P Value |
| Age (per yr)             | 1.03 (1.01, 1.04)          | 0.001   | 1.04 (1.02, 1.05)            | <0.0001 | 1.03 (1.02, 1.05)               | <0.0001 |
| Male sex                 | 2.39 (1.48, 3.87)          | <0.0001 | 2.79 (1.69, 4.62)            | <0.0001 | 2.63 (1.57, 4.41)               | <0.0001 |
| Ever smoker              | 1.22 (0.82, 1.82)          | 0.317   | 1.08 (0.71, 1.63)            | 0.722   | 1.03 (0.67, 1.59)               | 0.878   |
| Ever drinker             | 0.72 (0.35, 1.49)          | 0.377   | XX                           | XX      | XX                              | XX      |
| BMI (normal)             | Reference                  |         |                              |         |                                 |         |
| Overweight (BMI 25-29.9) | 1.55 (0.97, 2.47)          | 0.067   | 1.54 (0.96, 2.48)            | 0.072   | 1.60 (0.97, 2.64)               | 0.066   |
| Obese I (BMI 30-34.9)    | 1.30 (0.72, 2.34)          | 0.389   | 1.70 (0.92, 3.13)            | 0.091   | 1.64 (0.86, 3.15)               | 0.135   |
| Obese II (BMI > 34.9)    | 1.30 (0.18, 9.47)          | 0.799   | 2.22 (0.30, 16.62)           | 0.437   | 2.26 (0.30, 17.24)              | 0.432   |
| Hiatal Hernia            | 1.00 (0.62, 1.63)          | 0.987   | 0.99 (0.61, 1.60)            | 0.958   | 0.92 (0.54, 1.55)               | 0.741   |
| Diabetes                 | 0.61 (0.19, 1.94)          | 0.404   | 0.33 (0.06, 1.85)            | 0.207   | 0.54 (0.04, 6.93)               | 0.639   |

**Supplementary table ST6b. Analysis of associations with medications (conventional analysis) in a subset of BE patients who have not have surveillance endoscopy in the last 3 years (as a surrogate marker for BE patients without dysplasia).**

|              |                            |         | > 12 months                  |         | < 1 Endo in past 3 yr        |         |
|--------------|----------------------------|---------|------------------------------|---------|------------------------------|---------|
| <b>Drugs</b> | <b>Univariate Analysis</b> |         | <b>Multivariate Analysis</b> |         | <b>Multivariate Analysis</b> |         |
|              | HR (95% CI)                | P value | HR (95% CI)                  | P value | HR (95% CI)                  | P value |
| PPIs         | 0.98 (0.57, 1.69)          | 0.938   | 1.05 (0.59, 1.86)            | 0.86    | 1.05 (0.59, 1.87)            | 0.868   |
| NSAIDs       | 0.94 (0.63, 1.40)          | 0.746   | 0.94 (0.63, 1.41)            | 0.77    | 0.96 (0.63, 1.46)            | 0.841   |
| Statins      | 0.75 (0.44, 1.30)          | 0.309   | 0.61 (0.34, 1.10)            | 0.102   | 0.66 (0.36, 1.22)            | 0.187   |
| Metformin    | 0.64 (0.20, 2.02)          | 0.449   | 0.51 (0.09, 2.81)            | 0.437   | 1.02 (0.08, 13.05)           | 0.987   |
| Insulin      | 0.65 (0.09, 4.68)          | 0.673   | 0.57 (0.10, 3.35)            | 0.537   | XX                           | XX      |
| OAD          | 0.85 (0.35, 2.10)          | 0.732   | 3.38 (0.82, 13.95)           | 0.092   | 1.17 (0.18, 7.85)            | 0.868   |

**Supplementary table ST6c. Analysis of associations with medications (time varying analysis) in a subset of BE patients who have not have surveillance endoscopy in the last 3 years (as a surrogate marker for BE patients without dysplasia).**

| <b>Time varying</b> | <b>&gt; 12 months</b> |                | <b>&lt; 1 Endo in past 3 yr</b> |                |
|---------------------|-----------------------|----------------|---------------------------------|----------------|
|                     | <b>HR (95% CI)</b>    | <b>P value</b> | <b>HR (95% CI)</b>              | <b>P value</b> |
| PPIs                | 0.43 (0.36, 0.52)     | <0.0001        | 0.42 (0.34, 0.52)               | <0.0001        |
| NSAIDs              | 0.15 (0.01, 1.86)     | 0.14           | 0.17 (0.01, 2.00)               | 0.16           |
| Statins             | 0.61 (0.45, 0.83)     | 0.002          | 0.63 (0.46, 0.85)               | 0.003          |
| Metformin           | 0.57 (0.27, 1.21)     | 0.142          | 0.59 (0.29, 1.21)               | 0.152          |
| Insulin             | xx                    | xx             | xx                              | xx             |
| OAD                 | 1.26 (0.89, 1.78)     | 0.193          | 1.26 (0.89, 1.78)               | 0.192          |

**Supplementary Table ST7a: Predictors of progression to esophageal carcinoma after exclusion of estimated esophageal squamous cell cancers: Demographic and lifestyle factors**

| Variables                | Univariate Analysis |         | Multivariate Analysis |         |
|--------------------------|---------------------|---------|-----------------------|---------|
|                          | HR (95% CL)         | P Value | HR (95% CL)           | P Value |
| Age (per yr)             | 1.02 (1.01, 1.04)   | 0.001   | 1.04 (1.02, 1.05)     | <0.0001 |
| Male sex                 | 2.32 (1.42, 3.81)   | 0.001   | 2.75 (1.63, 4.64)     | <0.0001 |
| Ever smoker              | 1.17 (0.78, 1.76)   | 0.456   | 1.03 (0.67, 1.59)     | 0.886   |
| BMI (normal)             | Reference           |         |                       |         |
| Overweight (BMI 25-29.9) | 1.72 (1.06, 2.81)   | 0.029   | 1.68 (1.04, 2.74)     | 0.036   |
| Obese I (BMI 30-34.9)    | 1.47 (0.80, 2.69)   | 0.216   | 1.69 (0.89, 3.21)     | 0.109   |
| Obese II (BMI > 34.9)    | 1.43 (0.19, 10.52)  | 0.725   | 2.50 (0.33, 18.79)    | 0.375   |
| Hiatal Hernia            | 0.97 (0.58, 1.60)   | 0.899   | 0.96 (0.58, 1.59)     | 0.873   |
| Diabetes                 | 0.66 (0.21, 2.07)   | 0.472   | 0.76 (0.14, 3.96)     | 0.741   |

**Supplementary Table ST7b: Conventional model: Predictors of progression to esophageal carcinoma after exclusion of estimated esophageal squamous cell cancers – Medications**

| Drugs     | Univariate Analysis |         | Multivariate Analysis |         |
|-----------|---------------------|---------|-----------------------|---------|
|           | HR (95% CI)         | P value | HR (95% CI)           | P value |
| PPIs      | 0.89 (0.52, 1.55)   | 0.692   | 0.96 (0.54, 1.69)     | 0.879   |
| NSAIDs    | 0.98 (0.65, 1.49)   | 0.933   | 0.98 (0.64, 1.49)     | 0.924   |
| Statins   | 0.82 (0.47, 1.41)   | 0.469   | 0.67 (0.37, 1.21)     | 0.181   |
| Metformin | 0.45 (0.11, 1.84)   | 0.268   | 0.29 (0.05, 1.72)     | 0.174   |
| Insulin   | 0.70 (0.10, 5.02)   | 0.725   | 0.85 (0.18, 3.96)     | 0.831   |
| OAD       | 0.72 (0.27, 1.98)   | 0.53    | 1.96 (0.37, 10.26)    | 0.426   |



**Supplementary Table ST7c: Time varying model: Predictors of progression to esophageal carcinoma after exclusion of estimated esophageal squamous cell cancers - Medications**

| <b>Drugs</b> | <b>HR (95% CI)</b> | <b>P value</b> |
|--------------|--------------------|----------------|
| PPIs         | 0.44 (0.36, 0.53)  | <0.0001        |
| NSAIDs       | 0.17 (0.01, 1.98)  | 0.155          |
| Statins      | 0.60 (0.43, 0.83)  | 0.002          |
| Metformin    | 0.58 (0.28, 1.21)  | 0.146          |
| OAD          | 1.27 (0.90, 1.80)  | 0.18           |
